# Supplementary material
Source: PubMed Central journal article supplement (PMC8575520)
Supplement: Hudon.pdf [file Hudon.pdf]

## Supplementary Materials for

Hudon C, Chouinard M, Bisson M, Danish A, Karam M, Girard A, Bossé P, Lambert M. Case study with a participatory approach: rethinking pragmatics of stakeholder engagement for implementation research. *Ann Fam Med*. 2021;19(6):540-546.

**Supplemental Table 1. Committees and Roles of Stakeholders Within the PriCARE Program**

| Component                                                                                                | Composition                                                                                                                                                                                                                                                            | Functions                                                                                                                                                                                                                                        | Meeting Duration and Frequency                                   |
|----------------------------------------------------------------------------------------------------------|------------------------------------------------------------------------------------------------------------------------------------------------------------------------------------------------------------------------------------------------------------------------|--------------------------------------------------------------------------------------------------------------------------------------------------------------------------------------------------------------------------------------------------|------------------------------------------------------------------|
| Central coordination committee (Quebec)                                                                  | <ul style="list-style-type: none"> <li>• Nominated principal investigator</li> <li>• Co-principal investigator</li> <li>• Research coordinator</li> <li>• Two research assistants</li> <li>• One patient lead</li> <li>• One patient partner</li> </ul>                | <ul style="list-style-type: none"> <li>• To coordinate all activities of the PriCARE program</li> <li>• To ensure implementation of the intervention in the 2 primary care clinics in Quebec</li> </ul>                                          | 2.5 hours, once a week                                           |
| Steering committee                                                                                       | <ul style="list-style-type: none"> <li>• Nominated principal investigator</li> <li>• Co-principal investigators (1 per province)<sup>a</sup></li> <li>• Research coordinator</li> <li>• Research assistants (1 per province)</li> <li>• Three patient leads</li> </ul> | <ul style="list-style-type: none"> <li>• To ensure coordination and progress versus timeline, and deal with any potential challenges as they arise</li> <li>• To make strategic decisions and to orient knowledge transfer activities</li> </ul> | 1 hour, once a month                                             |
| Provincial monitoring committees (Newfoundland & Labrador, Nova Scotia, New-Brunswick, and Saskatchewan) | <ul style="list-style-type: none"> <li>• Co-principal investigator (1 per province)</li> <li>• Coinvestigators</li> <li>• Research assistants (1 per province)</li> <li>• Patient leads (1 per province)</li> <li>• Patient partners (1 or 2 per province)</li> </ul>  | <ul style="list-style-type: none"> <li>• To ensure implementation of the intervention and its evaluation in the 2 primary care clinics of each province</li> </ul>                                                                               | Once a week (once or twice every 2 months with patient partners) |
| Practice community for research coordinators                                                             | <ul style="list-style-type: none"> <li>• Research coordinator</li> <li>• Research assistants (1 per province)</li> </ul>                                                                                                                                               | <ul style="list-style-type: none"> <li>• To coordinate and perform research activities in each province (ethics approvals, participants recruitment, data collection, data analysis, knowledge transfer)</li> </ul>                              | Once a month                                                     |
| Practice community for patient partners                                                                  | <ul style="list-style-type: none"> <li>• Research coordinator</li> <li>• Research assistants (1 per province)</li> <li>• Patient leads (2 for English-speaking)</li> </ul>                                                                                             | <ul style="list-style-type: none"> <li>• To include the patient perspective all along the research process (data collection tools, analysis process, results presentation, etc)</li> </ul>                                                       | Once a month                                                     |

|                                                                                                         |                                                                                                                                                                                                                                                                                                                                  |                                                                                                                                                                                                                                                                                                                                                                                                                                              |                                   |
|---------------------------------------------------------------------------------------------------------|----------------------------------------------------------------------------------------------------------------------------------------------------------------------------------------------------------------------------------------------------------------------------------------------------------------------------------|----------------------------------------------------------------------------------------------------------------------------------------------------------------------------------------------------------------------------------------------------------------------------------------------------------------------------------------------------------------------------------------------------------------------------------------------|-----------------------------------|
| Practice community for case managers (1 for English-speaking provinces, 1 for French-speaking province) | <ul style="list-style-type: none"> <li>provinces, 1 for French-speaking province)</li> <li>• Patient partners (1 or 2 per province)</li> <li>• Co–principal investigator with expertise in case management</li> <li>• Research coordinator</li> <li>• All case managers implementing the case management intervention</li> </ul> | <ul style="list-style-type: none"> <li>• To give feedback to the steering committee in a way to improve the patient partners engagement</li> <li>• To support case managers and develop their confidence in the delivering of the case management intervention</li> <li>• To exchange about challenges encountered in the delivering of the case management intervention and develop problem solving strategies (action learning)</li> </ul> | Once every 2 months               |
| Two primary care clinics per province                                                                   | <ul style="list-style-type: none"> <li>• Clinic manager</li> <li>• Primary care clinicians</li> <li>• Case managers</li> </ul>                                                                                                                                                                                                   | <ul style="list-style-type: none"> <li>• To support implementation and to deliver the case management intervention in their clinic</li> </ul>                                                                                                                                                                                                                                                                                                | Variable, depending on the clinic |
| Complete team meetings                                                                                  | <ul style="list-style-type: none"> <li>• All team members</li> </ul>                                                                                                                                                                                                                                                             | <ul style="list-style-type: none"> <li>• To foster group cohesion</li> <li>• Keep everyone informed within PriCARE</li> <li>• Involve stakeholders in key-decisions</li> </ul>                                                                                                                                                                                                                                                               | 3 meetings in 4 years             |

---

PriCARE = primary care research program.

<sup>a</sup>The link with decision makers was made at the provincial level by each principal investigator.

**Supplemental Figure 1. Governance structure of the PriCARE program,**

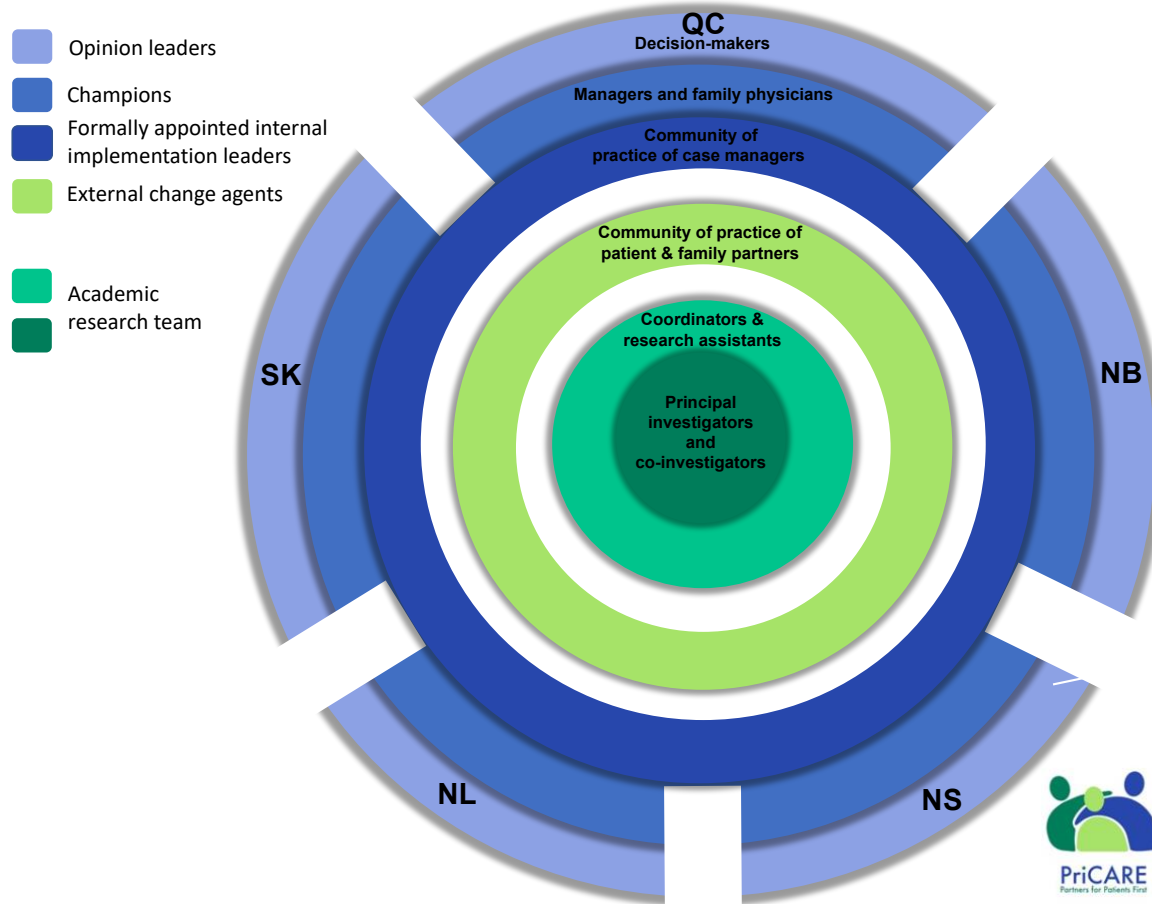

NB = New Brunswick; NL = Newfoundland and Labrador; NS = Nova Scotia; PriCARE = primary care research program; QC = Quebec; SK = Saskatchewan.
